# Supplementary material for: UPLC-Q-TOF/MS-Based Plasma Metabolomics to Evaluate the Effects of Aspirin Eugenol Ester on Blood Stasis in Rats
Source: PubMed Central journal article supplement (PMC6651160; doi:10.3390/molecules24132380), 2019-06-27
Supplement: molecules-24-02380-s001.pdf [file molecules-24-02380-s001.pdf]

**Figure S1** Typical UPLC-Q-TOF/MS total ion chromatograms of rat plasma in each condition in positive (A) and negative ion modes (B).

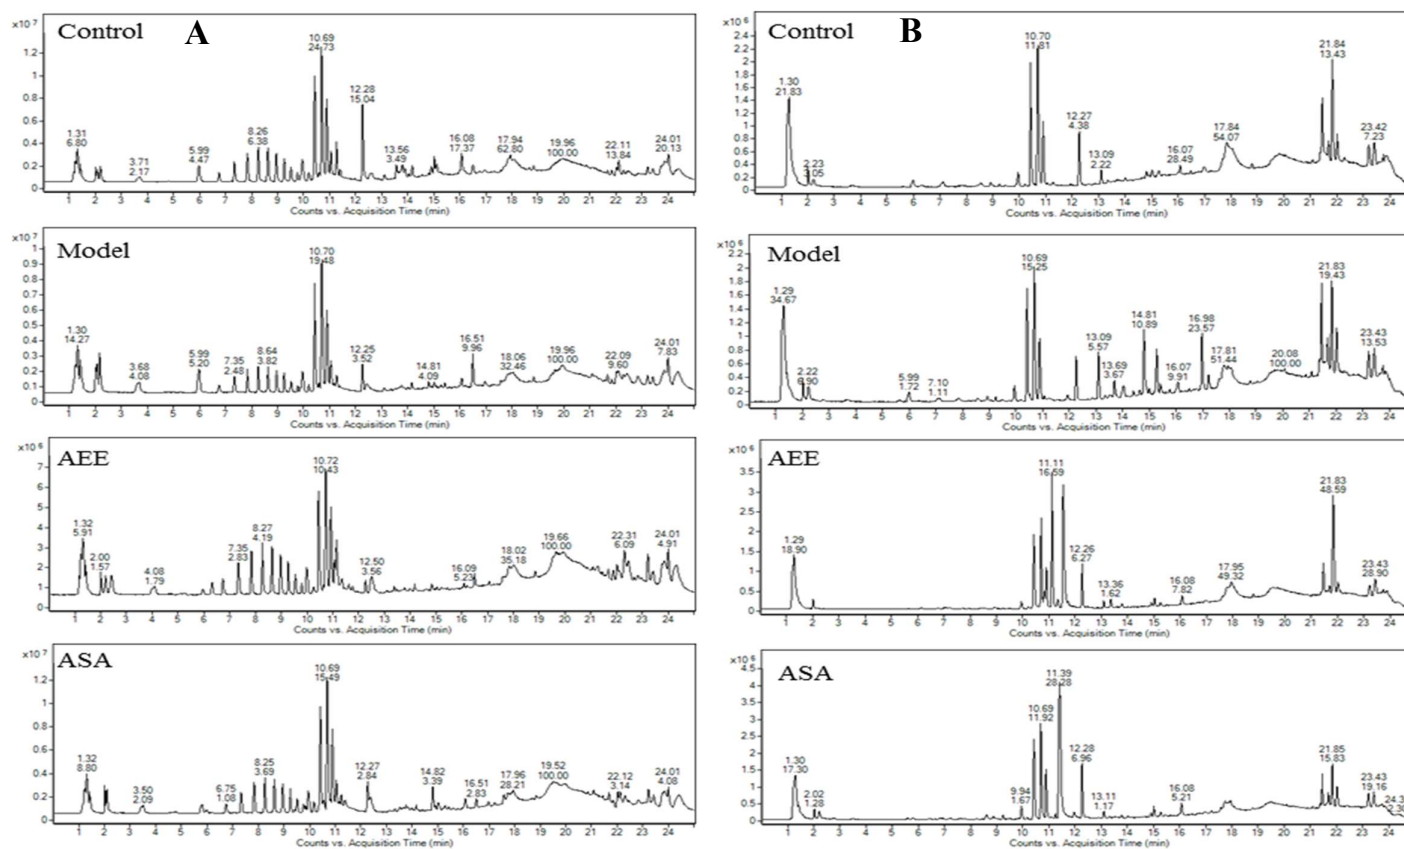

The x-axis was the retention time (min) and the y-axis was the intensity. Retention time (min) and relative intensity (%) were labeled on the peaks (up and below, respectively).

**Figure S2** PCA score plots of plasma analyzed by UPLC-TOF/MS in positive and negative modes.

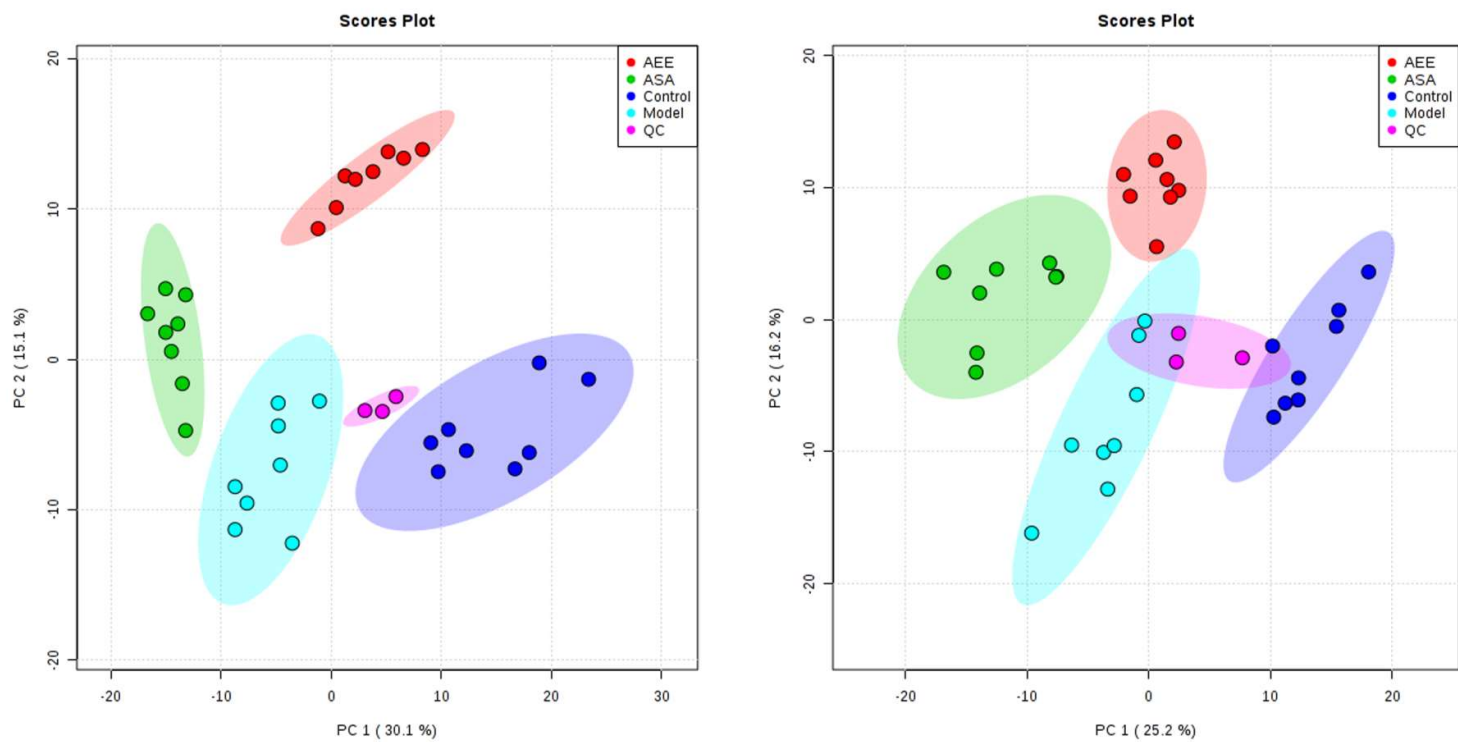

PCA score plots of all the samples in the study. ESI+:  $R^2X = 0.452$ , ESI-:  $R^2X = 0.414$ . All the QC samples were clustered tightly, indicating the analysis method was robust with good repeatability and stability.

**Figure S3** OPLS-DA score plots of the plasma samples in AEE and ASA groups.

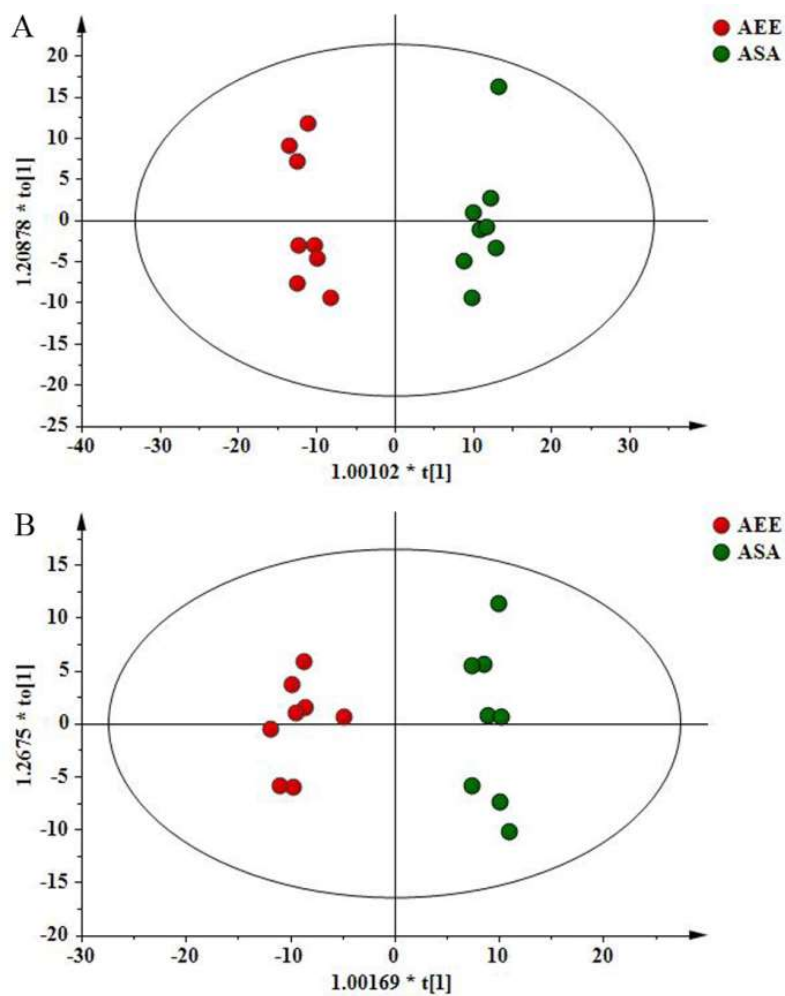

OPLS-DA analysis was performed between AEE and ASA groups. A: positive ion mode,  $R^2X = 0.551$ ,  $R^2Y = 0.981$  and  $Q^2 = 0.968$ . B: negative ion mode,  $R^2X = 0.418$ ,  $R^2Y = 0.969$  and  $Q^2 = 0.89$ .

**Figure S4** S-plots of the corresponding OPLS-DA models in positive and negative ion modes.

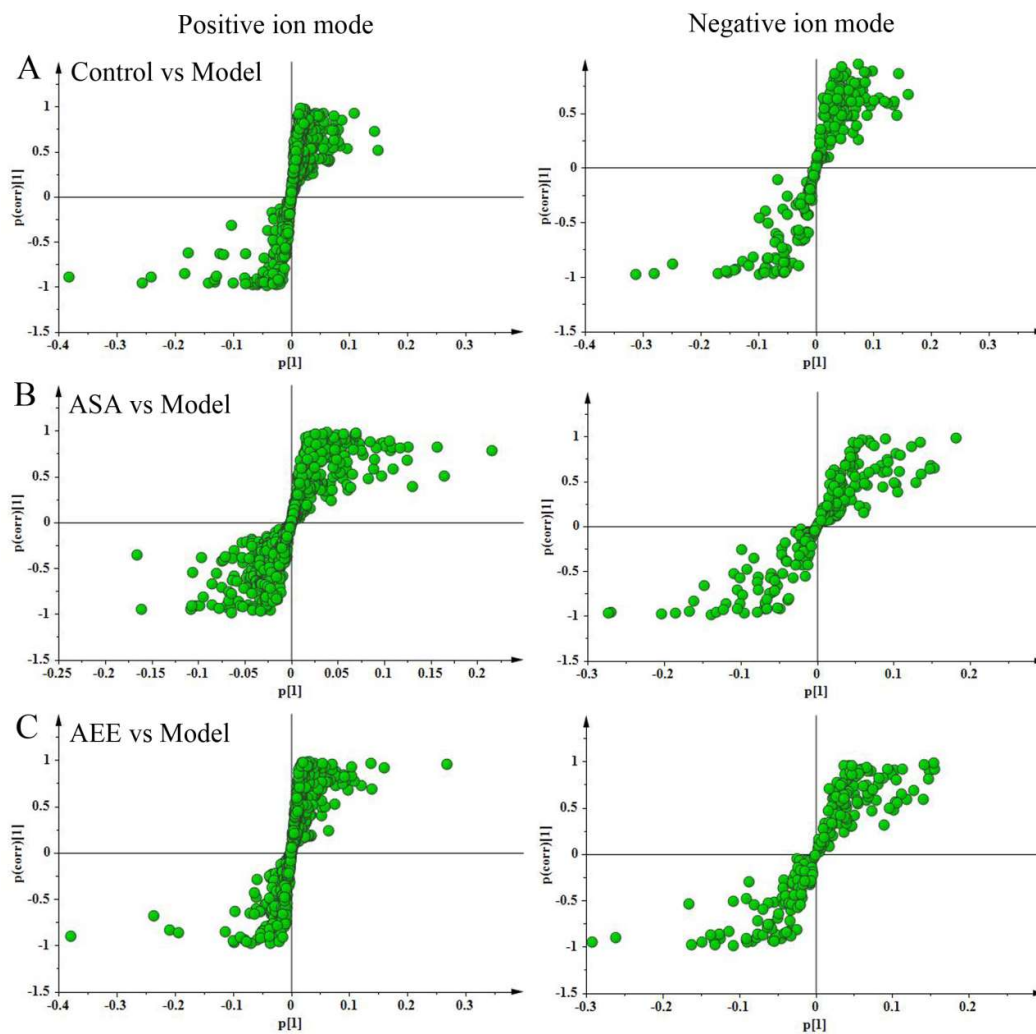

S-plot was applied to visualize the variable influence, which combines the covariance (x-axis) and correlation (y-axis) loading profiles resulting from OPLS-DA models.

**Figure S5** Heatmap and cluster analysis of the significantly changed metabolites in different groups.

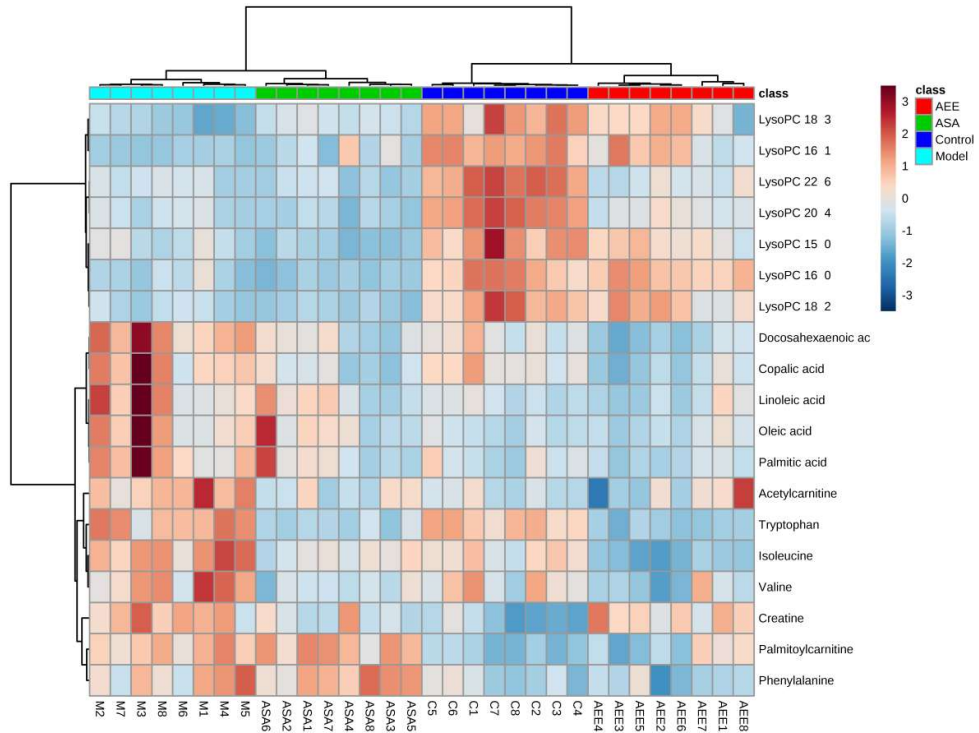

C: samples in control group; M: samples in HFD group; AEE: samples in AEE group; ASA: samples in aspirin group.

Table S1 Comparison of the metabolites relative intensity in different group.

| No. | Metabolite           | Relative intensity         |             |                         |                             |
|-----|----------------------|----------------------------|-------------|-------------------------|-----------------------------|
|     |                      | Control                    | Model       | ASA                     | AEE                         |
| 1   | LysoPC (22:6)        | 9.09±1.08 <sup>##</sup>    | 4.24±0.71   | 3.58±0.75               | 4.65±0.78 <sup>▲</sup>      |
| 2   | LysoPC (18:3)        | 0.58±0.12 <sup>##</sup>    | 0.17±0.07   | 0.28±0.03 <sup>##</sup> | 0.4±0.14 <sup>##</sup>      |
| 3   | Creatine             | 1.39±0.65 <sup>##</sup>    | 3.34±0.71   | 2.35±0.69 <sup>#</sup>  | 3.06±0.61                   |
| 4   | LysoPC (15:0)        | 1.57±0.34 <sup>##</sup>    | 0.83±0.16   | 0.56±0.10 <sup>##</sup> | 1.14±0.18 <sup>##▲▲</sup>   |
| 5   | Acetylcarnitine      | 0.90±0.17 <sup>##</sup>    | 1.58±0.35   | 0.98±0.25 <sup>##</sup> | 0.97±0.64 <sup>#</sup>      |
| 6   | LysoPC (20:4)        | 34.88±3.55 <sup>##</sup>   | 16.45±2.64  | 13.22±2.27 <sup>#</sup> | 19.80±2.21 <sup>#▲▲</sup>   |
| 7   | Palmitoylcarnitine   | 2.52±0.65 <sup>##</sup>    | 5.97±0.95   | 6.44±1.14               | 3.55±1.56 <sup>##▲▲</sup>   |
| 8   | LysoPC (16:0)        | 117.87±15.92 <sup>##</sup> | 74.19±10.18 | 65.48±4.41 <sup>#</sup> | 113.89±9.21 <sup>##▲▲</sup> |
| 9   | LysoPC (18:2)        | 37.98±7.04 <sup>##</sup>   | 20.57±2.74  | 18.24±1.72              | 33.07±6.09 <sup>##▲▲</sup>  |
| 10  | Phenylalanine        | 8.99±1.00 <sup>##</sup>    | 11.15±1.57  | 11.74±1.14              | 8.57±1.09 <sup>##▲▲</sup>   |
| 11  | LysoPC (16:1)        | 2.13±0.16 <sup>##</sup>    | 1.19±0.05   | 1.38±0.26               | 1.77±0.33 <sup>##▲</sup>    |
| 12  | Isoleucine           | 19.65±3.16 <sup>##</sup>   | 26.81±5.08  | 17.5±2.59 <sup>##</sup> | 8.86±2.34 <sup>##▲▲</sup>   |
| 13  | Valine               | 1.75±0.38                  | 2.12±0.46   | 1.4±0.21 <sup>##</sup>  | 1.28±0.41 <sup>##</sup>     |
| 14  | Linoleic acid        | 2.86±0.67 <sup>#</sup>     | 6.26±3.22   | 3.87±1.17               | 2.51±1.3 <sup>#</sup>       |
| 15  | Oleic acid           | 0.99±0.24 <sup>#</sup>     | 2.36±1.16   | 1.62±1.03               | 1.01±0.35 <sup>#</sup>      |
| 16  | Docosahexaenoic acid | 2.53±0.46 <sup>##</sup>    | 3.81±0.92   | 2.24±0.55 <sup>##</sup> | 1.59±0.43 <sup>##▲</sup>    |
| 17  | Tryptophan           | 5.02±0.53                  | 5.47±0.85   | 3.06±0.41 <sup>##</sup> | 2.67±0.31 <sup>##</sup>     |
| 18  | Copalic acid         | 2.73±0.45                  | 3.52±1.07   | 2.09±0.47 <sup>##</sup> | 1.82±0.45 <sup>##</sup>     |
| 19  | Palmitic acid        | 0.83±0.36 <sup>##</sup>    | 1.78±0.80   | 1.05±0.71               | 0.61±0.21 <sup>##</sup>     |

Data was expressed as mean ± SD; n = 8; <sup>#</sup>P < 0.05, <sup>##</sup>P < 0.01 compared with model group. <sup>▲</sup>P < 0.05, <sup>▲▲</sup>P < 0.01, compared with the ASA group.

Table S2 Pathway analysis results from MetaboAnalyst.

|                                                     | Total | Expected | Hits | Raw P    | Holm adjust | FDR      | Impact  |
|-----------------------------------------------------|-------|----------|------|----------|-------------|----------|---------|
| Biosynthesis of unsaturated fatty acids             | 42    | 0.35568  | 4    | 0.000278 | 0.022828    | 0.022828 | 0       |
| Aminoacyl-tRNA biosynthesis                         | 69    | 0.58433  | 4    | 0.001897 | 0.15369     | 0.077793 | 0.08    |
| Valine, leucine and isoleucine biosynthesis         | 11    | 0.093155 | 2    | 0.003468 | 0.27742     | 0.094786 | 0.28572 |
| Phenylalanine, tyrosine and tryptophan biosynthesis | 4     | 0.033874 | 1    | 0.033482 | 1           | 0.5108   | 0.5     |
| Valine, leucine and isoleucine degradation          | 38    | 0.32181  | 2    | 0.039027 | 1           | 0.5108   | 0.03922 |
| Fatty acid metabolism                               | 39    | 0.33028  | 2    | 0.040943 | 1           | 0.5108   | 0.02083 |
| Fatty acid biosynthesis                             | 43    | 0.36415  | 2    | 0.048964 | 1           | 0.5108   | 0       |
| Linoleic acid metabolism                            | 6     | 0.050812 | 1    | 0.049834 | 1           | 0.5108   | 0.5     |
| Phenylalanine metabolism                            | 11    | 0.093155 | 1    | 0.089612 | 1           | 0.81646  | 0.4     |
| Pantothenate and CoA biosynthesis                   | 15    | 0.12703  | 1    | 0.12033  | 1           | 0.9867   | 0.07692 |
| Fatty acid elongation in mitochondria               | 27    | 0.22865  | 1    | 0.20687  | 1           | 1        | 0       |
| Glycerophospholipid metabolism                      | 30    | 0.25406  | 1    | 0.22725  | 1           | 1        | 0.05263 |
| Glycine, serine and threonine metabolism            | 31    | 0.26253  | 1    | 0.23393  | 1           | 1        | 0       |
| Tryptophan metabolism                               | 40    | 0.33874  | 1    | 0.29176  | 1           | 1        | 0.13514 |
| Arginine and proline metabolism                     | 44    | 0.37262  | 1    | 0.31616  | 1           | 1        | 0.02041 |

Total: The total number of compounds in the pathways; the hits are the actually matched number from the upload data; the raw p is the original p value calculated from the enrichment analysis; the impact is the pathway impact value calculated from pathway analysis.
